# Supplementary material for: Crystal structure of TAZ-TEAD complex reveals a distinct interaction mode from that of YAP-TEAD complex
Source: PubMed Central journal article supplement (PMC5435683; doi:10.1038/s41598-017-02219-9), 2017-05-17
Supplement: 41598_2017_2219_MOESM1_ESM.pdf [file 41598_2017_2219_MOESM1_ESM.pdf]

## **Supplemental Information**

### **Crystal structure of TAZ-TEAD complex reveals a distinct interaction mode from that of YAP-TEAD complex**

Hung Yi Kristal Kaan, Siew Wee Chan, Siew Kim Joyce Tan, Fusheng Guo, Chun Jye Lim, Wanjin Hong, and Haiwei Song

**Figure S1**

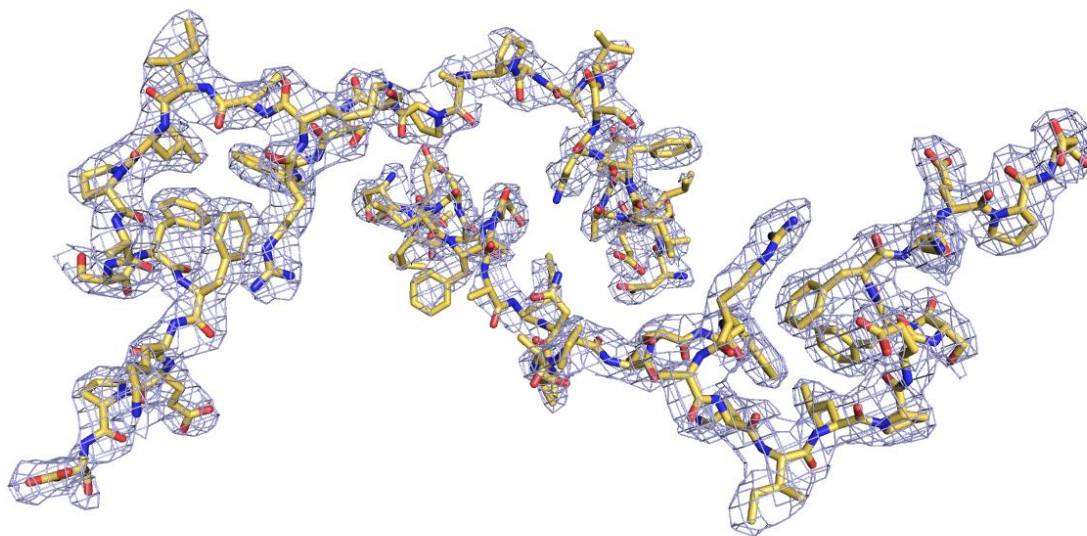

The distinct binding mode of TAZ (yellow sticks) to TEAD is revealed by the generation of a  $f_o-f_c$  omit map (contoured at  $\sigma=3.00$ ), to visualize the position and conformation adopted by the TAZ molecules.
